# Supplementary material for: Proteome-wide analysis of cysteine oxidation reveals metabolic sensitivity to redox stress
Source: PubMed Central journal article supplement (PMC5910380; doi:10.1038/s41467-018-04003-3), 2018-04-20
Supplement: 41467_2018_4003_MOESM3_ESM.pdf [file 41467_2018_4003_MOESM3_ESM.pdf]

## Description of Additional Supplementary Files

File Name: Supplementary Data 1

Description: SICyLIA proteomic results of all cysteine-containing peptides identified in *Fh1<sup>fl/fl</sup>* cells treated with 500  $\mu$ M hydrogen peroxide for 15 minutes compared to untreated cells, corresponding to Fig. 4 and Supplementary Fig. 2. Based on 4 independent experiments, single measurement. A Significance B value of 0.00E+00 indicates highly significant.

File Name: Supplementary Data 2

Description: SICyLIA proteomic results of all cysteine-containing peptides identified in *Fh1<sup>-/-</sup>* compared to *Fh1<sup>fl/fl</sup>* cells, corresponding to Fig. 7 and Supplementary Fig. 3. Based on 4 independent experiments, single measurement.

File Name: Supplementary Data 3

Description: SICyLIA proteomic results of all cysteine-containing peptides identified in *Fh1<sup>-/-</sup>* compared to *Fh1<sup>fl/fl</sup>* mouse kidney tissues, corresponding to Fig. 8 and Supplementary Fig. 4. Based on the comparison of 1 mouse per genotype, using 4 replicate tissue slices per mouse.
